# Supplementary material
Source: PubMed Central journal article supplement (PMC2937185)
Supplement: NIHMS213433-supplement-Supp1.pdf [file NIHMS213433-supplement-Supp1.pdf]

## **Supplementary Material**

### **Materials & Methods**

#### **Animal**

The strategy for generation of systemic *KLF15*<sup>-/-</sup> mouse was previously described<sup>1</sup>. Briefly, the targeting vector for KLF15 was constructed by inserting a nuclear lacZ reporter into the targeting vector which replaced exon 2 of the endogenous mouse KLF15 locus.

#### **Rat and mouse models of vascular injury**

Mouse femoral artery wire injury to the mouse common femoral artery was performed as previously described<sup>2, 3, 4</sup> in wildtype (n=17) and *KLF15*<sup>-/-</sup> mice (n=17).

#### **Primary rat and mouse smooth muscle culture**

Rat aortic smooth muscle cells (RASMC) and mouse aortic smooth muscle cells (MASMC) were obtained from 4-6 weeks old rats or mice by aorta explants culture method. Briefly, the aortas were removed and rinsed several times in PBS. The adventitia was gently removed; aorta was opened and endothelial cells were denuded. Aorta were cut into small pieces and incubated in SmBm (Clonetics) + 5%FBS at 37°C. Smooth muscle cells (SMC) were passaged when cells reached 80% confluence. SMC purity was detected by SMC  $\alpha$ -actin staining. At least 95% of cultured SMC were SMC  $\alpha$ -actin positive at passage 5.

Experiments were performed at cell passage 6-11. Same passage of wild type and *KLF15*<sup>-/-</sup> SMCs was used for each set of experiment. Cells were growth arrested at 80% confluence for 48h with growth factors depleted medium containing 0.1% fetal bovine serum. Experiments shown are representative of results from three independent cultures from each group of mice.

### **Histology and immunohistochemical analysis**

$\beta$ -galactosidase staining was performed as previously described<sup>1</sup>.

Two weeks after wire injury, femoral arteries were harvested for histological and morphometric analyses. Femoral artery sections were stained for elastin (Sigma), 5-bromo-2-deoxyuridine (BrdU)(Dako)<sup>5, 6</sup>, SMA  $\alpha$ - actin(Sigma), and CD45(BD Biosciences) staining. 1.5mg BrdU was injected into mice 1 day before euthanasia and another dose was given 1 hour before euthanasia. Femoral arteries were prepared and sectioned. Morphometric analysis and measurement were conducted by using Image-pro analyzer software. Every vessel was calculated as individual object when calculating intimal/medial area ratio.

### **Boyden chamber assay**

VSMCs migration was examined as previously described<sup>7</sup>.

### **DNA Synthesis Measurement**

DNA synthetic rate in RASMC's was determined by [<sup>3</sup>H]-thymidine incorporation as previously described<sup>8</sup>. RASMC's were infected with adenovirus for 12h at 50 MOI in DMEM after 12h serum starvation (>90% infection efficiency was

achieved at this time point). After 24 h serum starvation, cells were treated with fresh medium containing PDGFBB at 20ng/ml for 12h. <sup>3</sup>H-thymidine was added to a final concentration at 1μCi/ml during the final 2 hours of incubation.

### **RNA Isolation/Northern Analysis/Real-time PCR**

Total RNA was isolated from flash-frozen aortic tissue obtained from sham and vascular injury animals using TRIzol (Invitrogen) per manufacturer's instruction. 10mg of RNA was subjected to gel electrophoresis, blotted onto a nylon membrane, and hybridized for KLF15 and 18S as previously described<sup>9</sup>. Real-time PCR is performed as previously described<sup>10</sup>.

### **Statistical Analysis**

Data is expressed as mean ± SD. Differences between experimental groups were evaluated for statistical significance by using the Student's t test for unpaired data. P values <0.05 were considered statistically significant.

**Supplemental Table I**

## REFERENCES

1. Gray S, Feinberg MW, Hull S, Kuo CT, Watanabe M, Sen-Banerjee S, DePina A, Haspel R, Jain MK. The Kruppel-like factor KLF15 regulates the insulin-sensitive glucose transporter GLUT4. *J Biol Chem*. 2002; 277:34322-34328.
2. Sibinga NE, Foster LC, Hsieh CM, Perrella MA, Lee WS, Endege WO, Sage EH, Lee ME, Haber E. Collagen VIII is expressed by vascular smooth muscle cells in response to vascular injury. *Circ Res*. 1997; 80:532-541.
3. Roque M, Fallon JT, Badimon JJ, Zhang WX, Taubman MB, Reis ED. Mouse model of femoral artery denudation injury associated with the rapid accumulation of adhesion molecules on the luminal surface and recruitment of neutrophils. *Arterioscler Thromb Vasc Biol*. 2000; 20:335-342.
4. Wang Y, Sakuma M, Chen Z, Ustinov V, Shi C, Croce K, Zago AC, Lopez J, Andre P, Plow E, Simon DI. Leukocyte engagement of platelet glycoprotein Ibalphalpha via the integrin Mac-1 is critical for the biological response to vascular injury. *Circulation*. 2005; 112:2993-3000.
5. Gratzner HG. Monoclonal antibody to 5-bromo- and 5-iododeoxyuridine: A new reagent for detection of DNA replication. *Science*. 1982; 218:474-475.
6. Zhu B, Zhao G, Witte DP, Hui DY, Fagin JA. Targeted overexpression of IGF-I in smooth muscle cells of transgenic mice enhances neointimal formation through increased proliferation and cell migration after intraarterial injury. *Endocrinology*. 2001;142:3598-3606.
7. Law RE, Meehan WP, Xi XP, Graf K, Wuthrich DA, Coats W, Faxon D, Hsueh WA. Troglitazone inhibits vascular smooth muscle cell growth and intimal hyperplasia. *J Clin Invest*. 1996; 98:1897-1905.
8. Iskander K, Li J, Han S, Zheng B, Jaiswal AK. NQO1 and NQO2 regulation of humoral immunity and autoimmunity. *J Biol Chem*. 2006; 281:30917-30924.
9. Gray S, Wang B, Orihuela Y, Hong EG, Fisch S, Halder S, Cline GW, Kim JK, Peroni OD, Kahn BB, Jain MK. Regulation of gluconeogenesis by Kruppel-like factor 15. *Cell Metab*. 2007; 5:305-312.
10. Atkins GB, Wang Y, Mahabeleshwar GH, Shi H, Gao H, Kawanami D, Natesan V, Lin Z, Simon DI, Jain MK. Hemizygous deficiency of Kruppel-like factor 2 augments experimental atherosclerosis. *Circ Res*. 2008;103:690-693.

Supplemental Table I.

|                                 | WT               | KLF15 <sup>-/-</sup> | P value |
|---------------------------------|------------------|----------------------|---------|
| intimal area( $\mu\text{m}^2$ ) | 9385 $\pm$ 6186  | 15779 $\pm$ 8314     | 0.019   |
| medial area( $\mu\text{m}^2$ )  | 13438 $\pm$ 1567 | 15219 $\pm$ 2614     | 0.016   |
| intimal area/medial Area        | 0.65 $\pm$ 0.41  | 0.98 $\pm$ 0.47      | 0.011   |
| EEL area                        | 42616 $\pm$ 6739 | 50367 $\pm$ 8073     | 0.018   |
| % of intimal BrdU positive cell | 12.0 $\pm$ 7.1   | 20.0 $\pm$ 9.8       | 0.045   |

EEL : external elastic lamina
